# Supplementary material for: Secondary organic aerosol formation from isoprene photooxidation during cloud condensation–evaporation cycles
Source: Copernicus journal article supplement (doi:10.5194/acp-16-1747-2016), 2016-02-15
Supplement: Supplementary file 1 [file acp-16-1747-2016-supplement.pdf]

Supplement of Atmos. Chem. Phys., 16, 1747–1760, 2016  
<http://www.atmos-chem-phys.net/16/1747/2016/>  
doi:10.5194/acp-16-1747-2016-supplement  
© Author(s) 2016. CC Attribution 3.0 License.

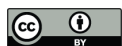

*Supplement of*

## **Secondary organic aerosol formation from isoprene photooxidation during cloud condensation–evaporation cycles**

**L. Brégonzio-Rozier et al.**

*Correspondence to:* L. Brégonzio-Rozier ([lola.bregonzio@lisa.u-pec.fr](mailto:lola.bregonzio@lisa.u-pec.fr)) and A. Monod ([anne.monod@univ-amu.fr](mailto:anne.monod@univ-amu.fr))

The copyright of individual parts of the supplement might differ from the CC-BY 3.0 licence.

Table S1: Summary of the maxima increases of the total particle mass concentration observed during cloud events for control experiments.

| Experiment*                | Increase in mass<br>( $\mu\text{g m}^{-3}$ ) | Cloud lifetime<br>(min) |
|----------------------------|----------------------------------------------|-------------------------|
| <b>Control experiments</b> |                                              |                         |
| C290113                    | 1.7                                          | 7                       |
| C310113                    | 1.3                                          | 8                       |
| C180313                    | 1.2                                          | 7                       |
| C150113                    | 0.9                                          | 8                       |
| C270113                    | 1.5                                          | 9                       |
| C120313                    | 2.2                                          | 8                       |
| C220313                    | 1.6                                          | 7                       |

\*Experimental IDs starting with “C” indicate control experiments.

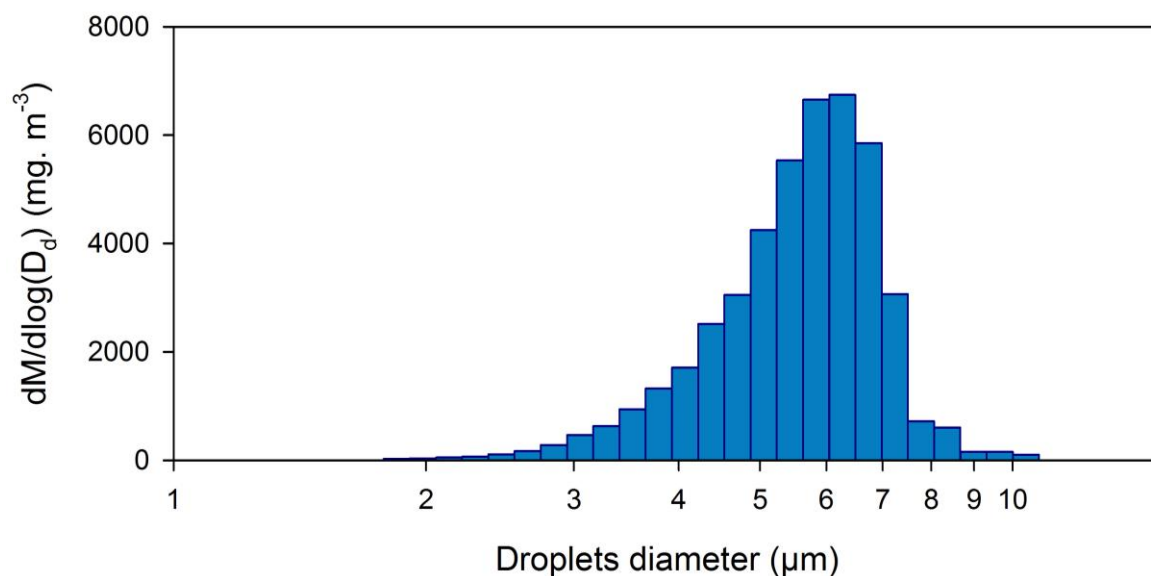

Figure S1: Droplet mass size distribution at the maximum liquid water content (LWC) during a cloud event in a diphasic experiment (D010213).

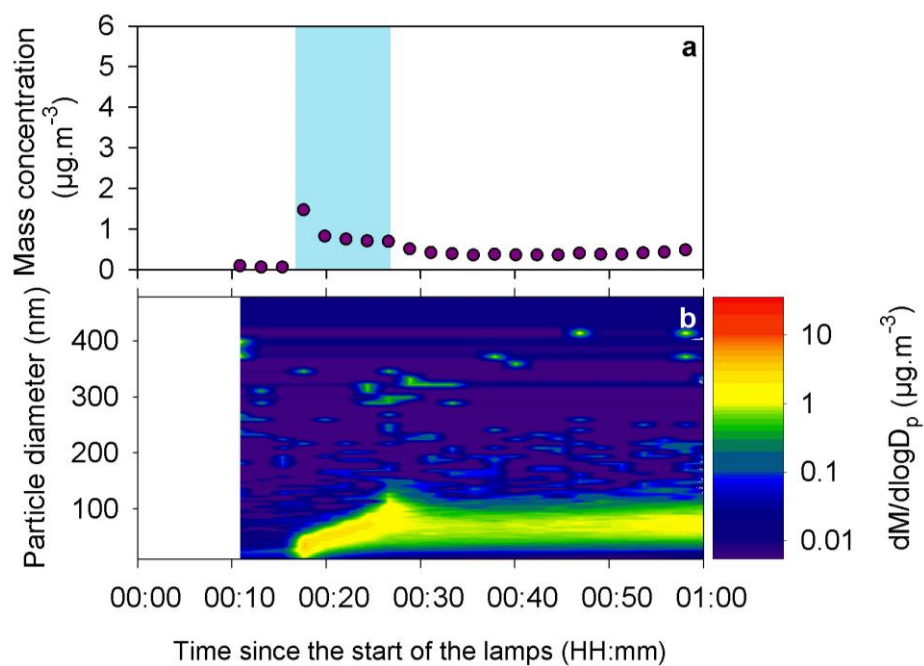

Figure S2: Time profiles of (a) particle mass concentration and (b) mass size distribution during a control experiment (C270113). Blue area indicates a cloud event.

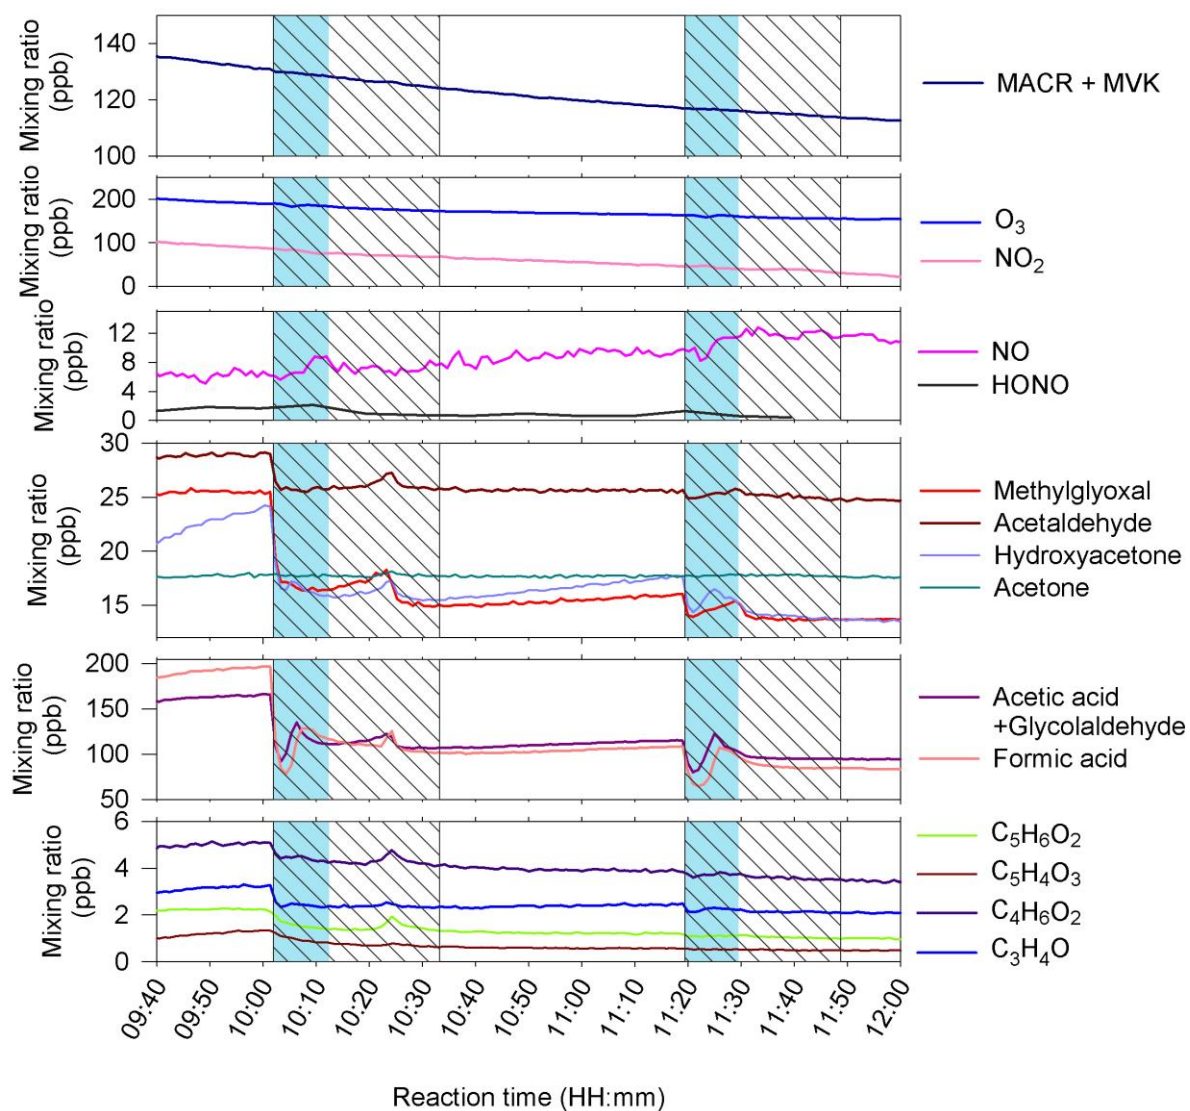

Figure S3: Time profiles of the gas phase reactants and isoprene oxidation products during a triphasic experiment (T280113). Blue areas indicate cloud events and hatched areas indicate time needed for PTR-ToF-MS stabilization after the start of cloud generation (droplet and memory effects in the sampling line).

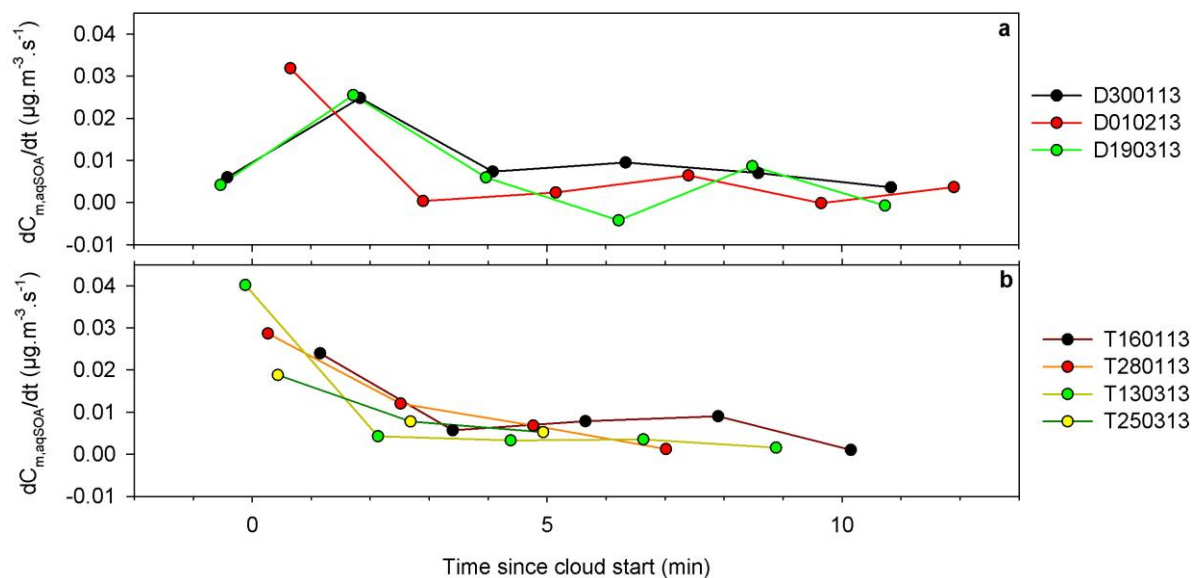

Figure S4: Time profiles of aqSOA production in (a) diphasic and (b) triphasic experiments.

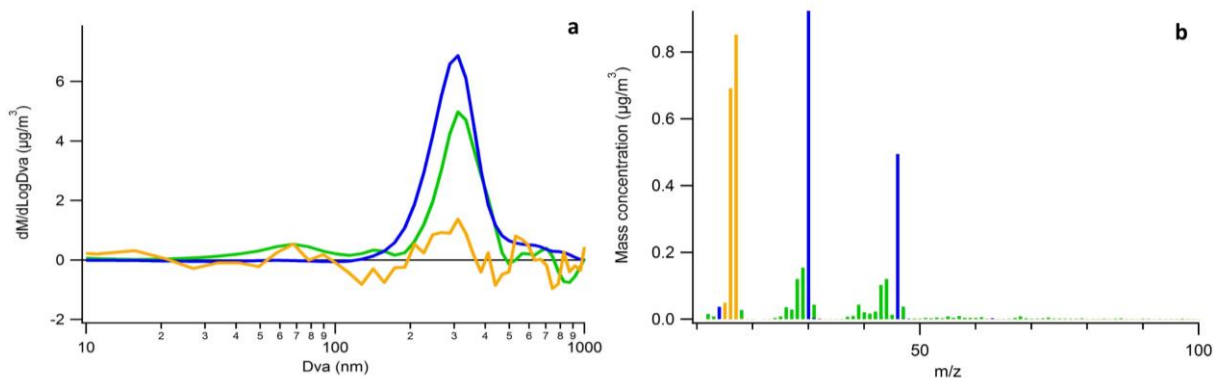

Figure S5: SOA chemical composition measured during a cloud event by an HR-ToF-AMS in a diphasic experiment (D300113): (a) dried aerosol mass size distributions; (b) mass spectra of dried aerosol (organic fragments are in green, nitrate fragments in blue and ammonium fragments in orange).

## Supplement Sect. 1: Expected VOCs dissolution in water at cloud start: calculation

Following a hypothesis based on the kinetic determination of the mass-transport of VOCs from the gas phase to water droplets (Schwartz, 1986), Henry's Law equilibrium was considered immediate at the start of cloud generation. This hypothesis was used to estimate the theoretical mass of individual VOCs transferred into the aqueous phase. The estimation was done using the experimental data of each gaseous VOC concentration prior cloud formation ( $C_{\text{before}}$ ) and using the measured LWC.

$$K_H = \frac{C_{i,a}}{p_i}$$

Where  $K_H$  is the Henry's law constant, expressed in  $\text{M atm}^{-1}$ ;  $C_{i,a}$  is the concentration in the aqueous phase of a species  $i$ , expressed in  $\text{M}$ ; and  $p_i$  is the partial pressure of the species  $i$  in the gas phase under equilibrium conditions, expressed in  $\text{atm}$ .

$$\text{Hence : } C_{i,a} = K_H \times p_i \text{ with } p_i = \frac{n_i \times R \times T}{V} = \frac{C_{\text{before}} \times R \times T}{101325}$$

Where  $C_{\text{before}}$  is expressed in  $\text{mol m}^{-3}$ ;  $R$  is the gas constant ( $8.314 \text{ m}^3 \text{ Pa K}^{-1} \text{ mol}^{-1}$ ); and  $T$  the temperature, expressed in  $\text{K}$ .

$C_{i,a}$  was converted in mass concentration ( $C_{i,m}$ ; expressed in  $\mu\text{g L}^{-1}$ ) using the molar mass  $M_i$  of the species  $i$ , expressed in  $\mu\text{g mol}^{-1}$ :

$$C_{i,m} = C_{i,a} \times M_i$$

$C_{i,m}$  was then converted in order to express the concentration of the species  $i$  in the gas phase ( $C_{i,g}$ , expressed in  $\mu\text{g m}^{-3}$ ) using the liquid water content ( $LWC$ ) of the generated cloud, expressed in  $\text{L m}^{-3}$ :

$$C_{i,g} = C_{i,m} \times LWC$$

The theoretical total mass of VOCs transferred into the aqueous phase was then determined by summing the  $C_{i,g}$ .
